# Supplementary material for: Sleep, Growth, and Puberty After 2 Years of Prolonged-Release Melatonin in Children With Autism Spectrum Disorder
Source: PubMed Central journal article supplement — J Am Acad Child Adolesc Psychiatry. Author manuscript; Available in PMC 2021 Apr 29. (PMC8084705; doi:10.1016/j.jaac.2019.12.007), 2020-01-23
Supplement: NIHMS1691958-supplement-1.pdf [file NIHMS1691958-supplement-1.pdf]

**FIGURE S1** Relationship Between Change in Composite Sleep Disturbance Index (CSDI) Score and Change in Total Sleep Time (TST) Recorded in the Sleep and Nap Diary (SND)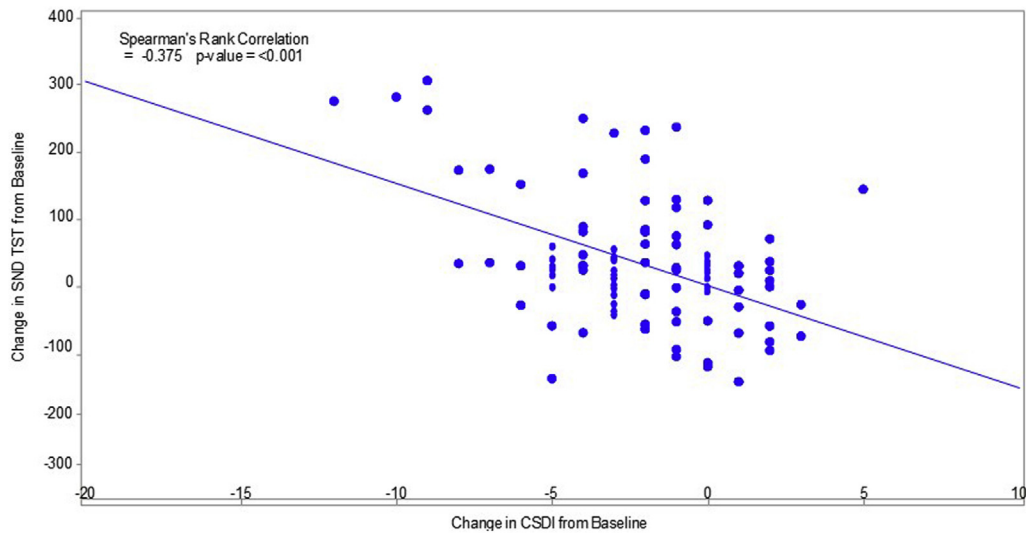

**Note:** Change was measured between baseline and 13 weeks of treatment, and a significant correlation was found.

**TABLE S1** Most Commonly Reported Serious Adverse Events (Safety Set)

|                                         | Double-blind phase (13 weeks) |                        | Open-label phase (91 weeks) |
|-----------------------------------------|-------------------------------|------------------------|-----------------------------|
|                                         | PedPRM group (n = 60)         | Placebo group (n = 65) | All participants (n = 95)   |
| Participants with at least 1 serious AE | 15 (25.0%)                    | 13 (20.0%)             | 24 (25.3%)                  |
| Serious AEs                             |                               |                        |                             |
| Agitation                               | 6 (10.0%)                     | 3 (4.6%)               | 0                           |
| Fatigue                                 | 4 (6.7%)                      | 2 (3.1%)               | 4 (4.2%)                    |
| Mood swings                             | 4 (6.7%)                      | 5 (7.7%)               | 5 (5.3%)                    |

**Note:** This table includes serious adverse events (AEs) reported by  $\geq 5\%$  patients in any group. PedPRM = pediatric prolonged-release melatonin.

**TABLE S2** Most Commonly Reported Treatment-Emergent Adverse Events (AEs) (Safety Set)

|                                                                                    | Double-blind phase<br>(13 weeks) |        |                          |        | Open-label phase<br>(91 weeks) |        |
|------------------------------------------------------------------------------------|----------------------------------|--------|--------------------------|--------|--------------------------------|--------|
|                                                                                    | PedPRM                           |        | Placebo                  |        | All PedPRM                     |        |
|                                                                                    | Participants<br>(n = 60)         | Events | Participants<br>(n = 65) | Events | Participants<br>(n = 95)       | Events |
| Participants with at least 1 TEAE                                                  | 51 (85.0%)                       |        | 50 (76.9%)               |        | 80 (84.2%)                     |        |
| Total number of AEs                                                                |                                  | 208    |                          | 156    |                                | 524    |
| AEs reported by $\geq 10\%$ participants                                           |                                  |        |                          |        |                                |        |
| Somnolence                                                                         | 17 (28.3%)                       | 18     | 8 (12.3%)                | 8      | 24 (25.3%)                     | 31     |
| Rate of somnolence events per participant<br>per 1 year of treatment <sup>a</sup>  |                                  | 1.2    |                          | 0.49   |                                | 0.19   |
| Fatigue                                                                            | 15 (25.0%)                       | 19     | 12 (18.5%)               | 13     | 25 (26.3%)                     | 33     |
| Rate of fatigue events per participant per 1<br>year of treatment <sup>a</sup>     |                                  | 1.27   |                          | 0.8    |                                | 0.20   |
| Mood swings                                                                        | 10 (16.7%)                       | 10     | 11 (16.9%)               | 12     | 17 (17.9%)                     | 24     |
| Rate of mood swings events per participant<br>per 1 year of treatment <sup>a</sup> |                                  | 0.67   |                          | 0.74   |                                | 0.14   |
| Upper respiratory tract infection                                                  | 9 (15.0%)                        | 9      | 7 (10.8%)                | 8      | 14 (14.7%)                     | 24     |
| Vomiting                                                                           | 8 (13.3%)                        | 11     | 10 (15.4%)               | 10     | 20 (21.1%)                     | 33     |
| Agitation                                                                          | 11 (18.3%)                       | 12     | 7 (10.8%)                | 8      | 8 (8.4%)                       | 10     |
| Headache                                                                           | 8 (13.3%)                        | 8      | 4 (6.2%)                 | 4      | 12 (12.6%)                     | 12     |
| Cough                                                                              | 7 (11.7%)                        | 7      | 5 (7.7%)                 | 5      | 16 (16.8%)                     | 27     |
| Dyspnea                                                                            | 6 (10.0%)                        | 6      | 4 (6.2%)                 | 4      | 10 (10.5%)                     | 10     |
| Rash                                                                               | 3 (5.0%)                         | 3      | 3 (4.6%)                 | 3      | 10 (10.5%)                     | 10     |

Note: PedPRM = pediatric prolonged-release melatonin; TEAE = treatment-emergent adverse event.

<sup>a</sup>Rate = number of observed events for the entire group divided by 13 (double-blind) or 91 (open-label), which equals the number of events for the entire group by week. This value is divided by the number of participants in the group to provide the number of events per week per participant. The value is multiplied by 52 (weeks/year) to determine the number of events per year of treatment per participant.

**TABLE S3** Most Commonly Reported Treatment-Related Adverse Events (AEs) (Safety Set)

|                                                                                 | Double-blind phase<br>(13 weeks) |        |                          |        | Open-label phase<br>(91 weeks) |        |
|---------------------------------------------------------------------------------|----------------------------------|--------|--------------------------|--------|--------------------------------|--------|
|                                                                                 | PedPRM                           |        | Placebo                  |        | All PedPRM                     |        |
|                                                                                 | Participants<br>(n = 60)         | Events | Participants<br>(n = 65) | Events | Participants<br>(n = 95)       | Events |
| Participants with at least 1 treatment-related AE                               | 12 (20.0%)                       |        | 11 (16.9%)               |        | 8 (8.4%)                       |        |
| Total number of AEs                                                             |                                  | 28     |                          | 17     |                                | 13     |
| Rate of AEs per participant per 1 year of treatment <sup>a</sup>                |                                  | 1.87   |                          | 1.05   |                                | 0.078  |
| AEs                                                                             |                                  |        |                          |        |                                |        |
| Somnolence                                                                      | 7 (11.7%)                        | 7      | 2 (3.1%)                 | 2      | 6 (6.3%)                       | 6      |
| Rate of somnolence events per participant per 1 year of treatment <sup>a</sup>  |                                  | 0.47   |                          | 0.12   |                                | 0.036  |
| Fatigue                                                                         | 2 (3.3%)                         | 4      | 3 (4.6%)                 | 3      | 6 (6.3%)                       | 8      |
| Rate of fatigue events per participant per 1 year of treatment <sup>a</sup>     |                                  | 0.27   |                          | 0.18   |                                | 0.048  |
| Mood swings                                                                     | 1 (1.7%)                         | 1      | 4 (6.2%)                 | 4      | 4 (4.2%)                       | 4      |
| Rate of mood swings events per participant per 1 year of treatment <sup>a</sup> |                                  | 0.067  |                          | 0.25   |                                | 0.024  |

**Note:** This table includes AEs reported as treatment-related by  $\geq 5\%$  patients in any group. PedPRM = pediatric prolonged-release melatonin.

<sup>a</sup>Rate = number of observed events for the entire group divided by 13 (double-blind) or 91 (open-label), which equals the number of events for the entire group by week. This value is divided by the number of participants in the group to provide the number of events per week per participant. The value is multiplied by 52 (weeks/year) to determine the number of events per year of treatment per participant.
